# Spatial Distribution of Breast Cancer in Sudan 2010-2016

Marwa Maweya Abdelbagi Elbasheer<sup>1\*</sup>, Ayah Galal Abdelrahman Alkhidir<sup>2</sup>, Siham Mohammed Awad Mohammed<sup>3</sup>, Areej Abuelgasim Hassan Abbas<sup>4</sup>, Aisha Osman Mohamed<sup>5</sup>, Isra Mahgoub Bereir<sup>6</sup>, Hiba Reyad Abdalazeez<sup>7</sup>, Mounkaila Noma<sup>8</sup>

1. Department of Histopathology & Cytology, Faculty of Medical Laboratory Sciences, Alzaiem Alazhari University, Khartoum, Sudan

2. Sudanese Medical Council, Khartoum, Sudan

3. Zanam Specialist Hospital, Khartoum, Sudan

4. Sudanese Medical Specialization Board, Khartoum, Sudan

5. Department of Histopathology & Cytology, Faculty of Medical Laboratory Sciences, Alzaiem Alazhari University, Khartoum, Sudan

6. Sudanese Medical Council, Khartoum, Sudan

7. Sudanese National Council for Medical & Health Professions, Khartoum, Sudan.

8. University of Medical Sciences and Technology, Khartoum, Sudan.

**\*Corresponding author:** [marwamaweya@hotmail.co.uk](mailto:marwamaweya@hotmail.co.uk) (MMAE)

## 31 **Abstract**

### 32 **Background:**

33 Breast cancer is the most prevalent cancer among females worldwide including Sudan. The aim of  
34 this study was to determine the spatial distribution of breast cancer in Sudan.

### 35 **Materials and methods:**

36 A facility based cross-sectional study was implemented in eighteen histopathology laboratories  
37 distributed in the three localities of Khartoum State on a sample of 4630 Breast Cancer cases  
38 diagnosed during the period 2010-2016. A master database was developed through Epi Info™  
39 7.1.5.2 for computerizing the data collected: the facility name, type (public or private), and its geo-  
40 location (latitude and longitude). Personal data on patients were extracted from their respective  
41 medical records (name, age, marital status, ethnic group, State, locality, administrative unit,  
42 permanent address and phone number, histopathology diagnosis). The data was summarized  
43 through SPSS to generate frequency tables for estimating prevalence and the geographical  
44 information system (ArcGIS 10.3) was used to generate the epidemiological distribution maps.  
45 ArcGIS 10.3 spatial analysis features were used to develop risk maps based on the kriging method.

### 46 **Results:**

47 Breast cancer prevalence was 3.9 cases per 100,000 female populations. Of the 4423 cases of  
48 breast cancer, invasive breast carcinoma of no special type (NST) was the most frequent (79.5%,  
49 3517/4423) histopathological diagnosis. The spatial analysis indicated as high risk areas for breast  
50 cancer in Sudan the States of Nile River, Northern, Red Sea, White Nile, Northern and Southern  
51 Kordofan.

### 52 **Conclusions:**

53 The attempt to develop a predictive map of breast cancer in Sudan revealed three levels of risk  
54 areas (risk, intermediate and high risk areas); regardless the risk level, appropriate preventive and  
55 curative health interventions with full support from decision makers are urgently needed.

56 **Keywords:** Breast Cancer; Spatial Distribution; Risk Map; Sudan

57

58

59

## 60 Introduction

61 Breast cancer (BC) is a heterogeneous group of diseases characterized by different pathologies,  
62 biological characteristics and clinical behaviors. It is the leading cancer among females worldwide  
63 with 641,000 cases reported in 1980 and 1,643,000 cases in 2010; the annual incidence increased  
64 between the two years was 3.1% [1]. In the year 2012, globally, BC represented 25% of all cancers  
65 and 15% of the cancer deaths among females [2]; in 2015, WHO reported 571000 deaths [3] while  
66 by 2020, 1.7 million new cases are expected mostly in the developing countries [4]. The recent shift  
67 in its burden in the developing world is revealed by a high mortality rate and a poorer overall  
68 survival [2, 4]. The geographical distribution of BC in Africa revealed a marked variation in  
69 incidence within the continent with a high incidence rate of 130 cases/100,000 populations in  
70 Northern African countries and a lowest rate of 95 cases/100,000 populations recorded in the  
71 Western part of the African continent [5]. The highest standardized mortality rate worldwide  
72 according to WHO six regions was found in the East Mediterranean Office (EMRO) and Africa  
73 Regional Office (AFRO) with respectively 18.6% and 17.2% [6].

74 In Sudan, the burden of cancer had increased from 303 cases in 1967 to 6303 in 2010 in which the  
75 BC represented the most common cancer [7]. Further studies [8,9] reported that the highest  
76 prevalence of cancers was recorded in the States of Khartoum, North Kordufan, Nile River,  
77 Northern, Gezira and White Nile states and BC was the most prevalent. According to the records of  
78 the Radiation Isotope Center Khartoum (RICK) and Gezira Institute for Cancer treatment and  
79 Molecular Biology (GICMB), BC was the most predominant malignancy among females with  
80 respectively 29-34.5% and 30.0% of the cancers registered. Most cases were young aged women.  
81 About 40% were below 45 years (mean age of 50) with late advanced disease. On the other hand,  
82 male cancer constituted 3.5-4% [10, 11]. Furthermore, studies from Red Sea State (2003-2006) and  
83 Central Sudan (1999-2006) revealed that the majority of the patients were premenopausal women  
84 (age <50 years) who presented with a late stage metastasized disease [12, 13].

85 A study [14] was conducted based on 6771 cases of cancers diagnosed in Khartoum State by Sudan  
86 First National Cancer registry during the period 2009 to 2010. The findings revealed that the most  
87 common cancer was Breast cancer with an incidence rate of 25.1 per 100,000. The study also  
88 reported the possibility of underestimation of the burden which could be due to factors such as  
89 stigmatization and poverty, leading to undiagnosed or untreated cases. Overestimation was also  
90 pointed out for elderly patients who might be treated symptomatically at primary care levels or died  
91 before reaching cancer specialized institutions.

92 Available statistics on breast cancer in Sudan are mostly restricted to central institutions such as  
93 RICK and GICMB and the geographical distribution of the disease yet is unknown. This paper  
94 aimed to estimate the burden of breast cancer and provide its spatial distribution country-wide.

## 95 **Materials and methods**

96 A facility based cross-sectional study was implemented. Data were extracted from eighteen  
97 histopathology laboratories within Khartoum State (Fig 1). In each of these laboratories, data  
98 collected included facility name, type (public or private), and geo-location (latitude and longitude).  
99 Personal data extracted from the facility records were name, age, marital status, ethnic group, state,  
100 locality, administrative unit, permanent address and phone number. Other information obtained  
101 from the records included the date of diagnosis and the histopathology diagnosis.

### 102 **Fig 1: Geographical distribution of the histopathology laboratories**

103 The master database, consisting of 4630 patient medical records was developed through Epi Info™  
104 7.1.5.2 and thereafter cleaned through the statistical package for social sciences (SPSS version 23)  
105 to exclude cases lacking important information such as the histopathology diagnosis, and date of  
106 diagnosis, as well as duplicated cases which were entered twice. The data of the remaining 4423  
107 records was then summarized through SPSS to generate the frequency distribution of the cases in  
108 term of person (age, gender) and type of cancer diagnosed by the histopathology centers.

109 Histopathology diagnoses recorded were invasive ductal carcinoma, invasive lobular carcinoma,  
110 carcinoma in situ and others, which were then regrouped to fit WHO 2012 classification [15]. The  
111 epidemiological distribution of breast cancer in Sudan was based on 1135 records for which data on  
112 residence were available. Those 1135 records were geo-referenced to facilitate the plotting of the  
113 residence of the patients. Prevalence was estimated using the updated 2016 Sudan Census Bureau  
114 and Statistics population data as a reference. ArcGIS 10.3 spatial analysis features were used to  
115 develop a risk map based on the krigging method [16].

## 116 Ethical Statement

117 Study ethical clearance was obtained from Khartoum State Ministry of Health, Directorate of  
118 innovation and Scientific research Ethical Committee on 11th May 2017. (S1 file)

## 119 Results:

120 A total of 4423 cases of breast cancer were recorded (2010-2016) from eighteen laboratories  
121 distributed in Khartoum State. Patients were aged 12 to 103 years with an average (median) age of  
122 48 years. They were predominately females 97.4% (4300/4413). The mean age at presentation was  
123 higher in males (61 years  $\pm$ 14.9) than in females (49 years  $\pm$ 14.2). Of the 4423 cases of breast  
124 cancer, invasive breast carcinoma of no special type (NST) was the most frequent histopathological  
125 diagnosis (79.5%, 3517/4423) followed by special subtypes of invasive carcinoma (12.4%,  
126 547/4423) and precursor lesions (3.2%, 142/4423) and the remaining 4.9% were classified as  
127 others. Females were paying the highest burden with a crude prevalence of 3.9 cases per 100,000  
128 female populations, ranging from 0.3 (Gedaref and Western Kordofan) to 22.1 in Khartoum as shown by  
129 Table 1 and Fig 2. On the other hand, male breast cancer was  $<1$  per 100,000 male populations.

130 **Fig 2: Epidemiological distribution of Breast Cancer in female population in Sudan (n=1135)**

131

132

133 **Table 1: Crude Prevalence (cases/100,000 population) of Breast Cancer in Sudan, data from eighteen histopathology**  
 134 **laboratories located in Khartoum State (n=1135)**

135

| States            | Cases recoded from Labs |             |           | Prevalence per 100,000 population* |            | Total population  |                   | SCBS              |
|-------------------|-------------------------|-------------|-----------|------------------------------------|------------|-------------------|-------------------|-------------------|
|                   | Number                  | Female      | Male      | Female                             | Male       | Female            | Male              | 2016              |
| Khartoum          | 786                     | 766         | 20        | 22.1                               | 0.5        | 3,464,536         | 3,920,622         | 7,385,158         |
| Red Sea           | 79                      | 77          | 2         | 12.5                               | 0.2        | 616,423           | 828,930           | 1,445,353         |
| El Gezira         | 45                      | 44          | 1         | 1.8                                | 0.1        | 2,464,166         | 2,295,598         | 4,759,764         |
| Northern Kordofan | 45                      | 44          | 1         | 2.7                                | 0.1        | 1,628,070         | 1,512,107         | 3,140,177         |
| White Nile        | 43                      | 42          | 1         | 3.5                                | 0.1        | 1,183,915         | 1,140,529         | 2,324,444         |
| River Nile        | 30                      | 29          | 1         | 4.2                                | 0.1        | 699,980           | 729,533           | 1,429,513         |
| Southern Darfur   | 27                      | 26          | 1         | 2.1                                | 0.1        | 1,244,275         | 1,299,942         | 2,544,217         |
| Northern          | 20                      | 19          | 1         | 4.4                                | 0.1        | 438,160           | 448,851           | 887,011           |
| Sennar            | 17                      | 17          | 0         | 1.8                                | 0.1        | 912,230           | 865,752           | 1,777,982         |
| Northern Darfur   | 14                      | 14          | 0         | 1.2                                | 0.0        | 1,115,490         | 1,165,395         | 2,280,885         |
| Blue Nile         | 7                       | 7           | 0         | 1.3                                | 0.0        | 517,492           | 531,874           | 1,049,366         |
| Southern Kordofan | 6                       | 6           | 0         | 1.2                                | 0.0        | 501,841           | 490,106           | 991,948           |
| Western Darfur    | 6                       | 6           | 0         | 2.0                                | 0.1        | 285,234           | 273,108           | 558,342           |
| Kassala           | 5                       | 5           | 0         | 0.5                                | 0.0        | 1,053,571         | 1,306,512         | 2,360,083         |
| Gedaref           | 3                       | 3           | 0         | 0.3                                | 0.0        | 1,012,329         | 999,285           | 2,011,614         |
| Western Kordofan  | 1                       | 1           | 0         | 0.3                                | 0.0        | 282,473           | 275,868           | 558,342           |
| Rumbeck**         | 1                       |             |           |                                    |            |                   |                   |                   |
| <b>Total</b>      | <b>1135</b>             | <b>1105</b> | <b>29</b> | <b>3.9</b>                         | <b>0.1</b> | <b>17,420,186</b> | <b>18,084,011</b> | <b>35,504,197</b> |

136

SCBS: Sudan Census Bureau and Statistics

137

\* Crude prevalence computed as number of breast cancer cases/ total female population x 100,000 female population all age

138

\*\* In Lakes State of South Sudan

139

140 The spatial analysis confirmed that Breast Cancer is a country-wide health problem. The risk of  
 141 breast cancer according to the map generated using the kriging method of the spatial distribution  
 142 indicated three gradient scale colors of risk (Fig 3). Risk areas included Western, Central, Southern  
 143 Darfur and partially Northern states, and a large part of Red Sea; Invasive carcinoma was  
 144 predominant type in those States. Intermediate risk areas, a mosaic for invasive carcinoma NST,  
 145 Special Subtypes of Invasive Carcinoma and Precursor lesions, included the States of Khartoum,  
 146 Gezira, White Nile, Kassala, Gedaref, Sennar, Eastern Darfur, and focally Northern Darfur. High  
 147 risk areas were the States of Nile River, Northern, Red Sea (focal), White Nile, Northern and  
 148 Southern Kordofan.

149 **Fig 3: Breast Cancer risk map in Sudan (n=1135)**

## 150 Discussion

151 Our findings revealed a crude prevalence of 3.9 cases per 100,000 female populations for the period  
152 2010 to 2016. This burden of Sudan females was also reported elsewhere in Sub-Saharan African  
153 countries, fluctuating from 4.5% (Zimbabwe) to 38.9/100 000 females in (South Africa) [17].

154 The average age of our patients was 48 years revealing that younger population was affected as  
155 reported in Central Africa (45.83 years) and Ghana (49.1 years) [18, 19]. On the contrary in  
156 developed countries, women are affected at older age respectively at 57 years and 62 years in New  
157 Zealand and United States [20, 21].

158 Invasive carcinoma of NST was the prevalent type (79.5%) of breast cancer in our study as  
159 previously published in Sudan [10], elsewhere it was 60% of breast cancer cases as reported by  
160 Badowska-Kozakiewicz, et al. [22].

161 The Epidemiological map generated per states indicated that the highest prevalence was recorded in  
162 Khartoum and Red Sea States with respectively 22.1 and 12.5 per 100,000 female populations. The  
163 figures from Khartoum and Red Sea States may be interpreted as related to the fact that most of the  
164 cases were reported from those States. We endorse the contrary based on the modeling which  
165 revealed that the spatial distribution predicts Khartoum State as intermediate risk whereas Red Sea  
166 State was displayed with a highly focal risk area. In the overall, we would like to emphasis that the  
167 breast cancer is a country wide public health problem. The delineated belt is a subject for further  
168 discussion related to the modeling technique and the limitations of the data which not include  
169 environmental and socio-economic factors.

170 This rapid evidence based delineation of breast cancer areas is a tool for guiding public health  
171 professionals and decision makers to establish a breast cancer program for fine tuning the  
172 epidemiological map and the subsequent risk map generated as applied in health sector in Iran [23]  
173 and elsewhere in Saudi Arabia [24] where the geographical information was used to set priorities.

174 One of the limitations of our model is the lack of environmental data to better assess the pattern of  
175 breast cancer which is a multi-factorial condition. The risk map was developed based on individual  
176 location of residence reported by the patients which may be a limiting factor leading to the over  
177 estimation or under estimation of the number of cases per State. This potential bias according to us  
178 was triggered out by the modeling approach of the krigging method which was used.

## 179 **Conclusion**

180 Our findings provided an understanding of the pattern of the spatial distribution of breast cancer  
181 country wide with hot spots defined as high risk and intermediate risk areas. As further data may be  
182 needed to improve the risk map, the decision makers and the health professionals should for equity  
183 reasons look at decentralizing of the health system which could not be efficient and operational if  
184 all the expertise are concentrated mainly in the State hosting the capital of country.

## 185 **Acknowledgements**

186 Authors would like to acknowledge the administration and staff of the eighteen histopathology  
187 laboratories for permitting the extraction of the data.

## 188 **References**

- 189 1. Forouzanfar MH, Foreman KJ, Delossantos AM, Lozano R, Lopez AD, Murray CJ, *et.al.* Breast  
190 and cervical cancer in 187 countries between 1980 and 2010: a systematic analysis. *Lancet*. 2011;  
191 378(9801): 1461-84.
- 192 2. Lindsey A. Torre, Freddie Bray, Rebecca L. Siegel, Jacques Ferlay, Joannie Lortet-Tieulent,  
193 Ahmedin Jemal. Global cancer statistics, 2012. *CA Cancer J Clin*. 2015; 65: 87–108.
- 194 3. World Health Organization. Cancer Fact Sheet 2018. Accessed March 13, 2018.  
195 <http://www.who.int/cancer/world-cancer-day/2018/en/>.
- 196 4. The Lancet. Breast cancer in developing countries. *Lancet Oncol*. 2009; 10:1077-85.
- 197 5. Ferlay J, Soerjomataram I, Ervik M, Dikshit R, Eser S, Mathers C, Rebelo M, Parkin DM,  
198 Forman D, Bray, F. GLOBOCAN 2012 v1.0, Cancer Incidence and Mortality Worldwide: IARC



- 199 CancerBase No. 11 [Internet]. Lyon, France: International Agency for Research on Cancer; 2013.  
200 Available from: <http://globocan.iarc.fr>, accessed on 31/3/2018.
- 201 6. MahshidGhoncheh, Zahra Pournamdar, Hamid Salehiniya. Incidence and Mortality and  
202 Epidemiology of Breast Cancer in the World. *Asian Pac J Cancer Prev*. 2016;17:43-6.
- 203 7. Amany Elamin, Muntaser E. Ibrahim, DafallaAbuidris, Kamal Eldin H. Mohamed and Sulma  
204 Ibrahim Mohammed. Part I: cancer in Sudan-burden, distribution, and trends breast, gynecological,  
205 and prostate cancers. *Cancer Medicine*. 2015; 4(3):447-56.
- 206 8. Ali AA, Ibrahim FE. Incidence and geographical distribution of cancer in Radiation and Isotopes  
207 Center in Khartoum. *Sudan Medical Monitor*. 2014; 9(3):109-11.
- 208 9. Saeed ME, Cao J, Fadul B, Kadioglu O, Khalid HE, Yassin Z, et al. A Five-year Survey of  
209 Cancer Prevalence in Sudan. *Anticancer Res*. 2016 Jan; 36(1):279-86.
- 210 10. Elhoweris, Mohammed. Sudan First International Conference on Breast Cancer 5th-7th  
211 December 2011, Khartoum Sudan. *Sudan Med J*. 2012 April; 48(1).
- 212 11. AmanyElamin, Muntaser E. Ibrahim, DafallaAbuidris, Kamal Eldin H. Mohamed and Sulma  
213 Ibrahim Mohammed. Part I: cancer in Sudan-burden, distribution, and trends breast, gynecological,  
214 and prostate cancers. *Cancer Medicine*. 2015; 4(3):447–56.
- 215 12. Ali K. Ageep, Babikir M. Ali, Mohamed A. Awadelkarim. Pattern and Incidence of Cancer in  
216 Red Sea State, Sudan. *Sudan JMS*. 2007; 2(2): 115-17.
- 217 13. Elgaili M Elgaili, Dafalla O Abuidris, Munazzah Rahman, Arthur M Michalek, Sulma I  
218 Mohammed. Breast cancer burden in central Sudan. *International Journal of Women’s Health*.  
219 2010; 277-82.
- 220 14. Intisar E Saeed, Hsin-Yi Weng, Kamal H Mohamed, and Sulma I Mohammed. Cancer  
221 incidence in Khartoum, Sudan: first results from the Cancer Registry, 2009–2010. *Cancer Med*.  
222 2014 Aug; 3(4): 1075–84. doi: 10.1002/cam4.254
- 223 15. Hans-Peter Sinna and Hans Kreipe. A Brief Overview of the WHO Classification of Breast  
224 Tumors, 4th Edition, Focusing on Issues and Updates from the 3rd Edition. *Breast Care*. 2013;  
225 8:149–54.
- 226 16. ESRI. How Kriging works. [http://desktop.arcgis.com/en/arcmap/10.3/tools/3d-analyst-  
227 toolbox/how-kriging-works.htm](http://desktop.arcgis.com/en/arcmap/10.3/tools/3d-analyst-toolbox/how-kriging-works.htm).

- 228 17. Surbhi Grover, Yehoda M. Martei, Priya Puri, Pooja Prabhakar, Miriam Mutebi, Onyinye D.  
229 Balogun, et.al. Breast cancer and HIV in SSA: a complex relationship. *J Glob Oncol*. 2017.
- 230 18. Augustin Balekouzou, Ping Yin, Christian Maucler Pamatika, Ghose Bishwajit, Sylvain  
231 Wilfrid Nambei, Marceline Djeintote, et al. Epidemiology of breast cancer: retrospective study in  
232 the Central African Republic. *BMC Public Health*. 2016. 16: 1230. doi: 10.1186/s12889-016-3863-  
233 6
- 234 19. Ohene-Yeboah M and Adjei E. Breast Cancer in Kumasi, Ghana. *Ghana Medical Journal*.  
235 2012; 46(1):8-13.
- 236 20. National Cancer Institute. SEER Cancer Statistics Review, 1975-2014. Bethesda, MD  
237 Accessed on March 22 2018. , [http://seer.cancer.gov/csr/1975\\_2014/](http://seer.cancer.gov/csr/1975_2014/), 2017.
- 238 21. Seneviratne S, Lawrenson R, Harvey V, Ramsaroop R, Elwood M, Scott N, et.al. Stage of  
239 breast cancer at diagnosis in New Zealand: impacts of socio-demographic factors, breast cancer  
240 screening and biology. *BMC Cancer*. 2016 Feb 19;16:129. doi: 10.1186/s12885-016-2177-5.
- 241 22. Anna M. Badowska-Kozakiewicz, Anna Liszcz, Maria Sobol, and Janusz Patera. Retrospective  
242 Evaluation of Histopathological Examinations in Invasive Ductal Breast Cancer of No Special  
243 Type: An Analysis of 691 Patients. *Archives of Medical Science*. 2017; 13(6): 1408–15.  
244 doi: 10.5114/aoms.2015.53964
- 245 23. Mahdavifar N, Pakzad R, Ghoncheh M, Pakzad I, Moudi A, Salehiniya H. The Spatial Analysis  
246 of Breast Cancer Incidence in Iran. *Asian Pac J Cancer Prev*. 2016; 17, Cancer Control in Western  
247 Asia Special Issue: 59-64. DOI:<http://dx.doi.org/10.7314/APJCP.2016.17.S3.59>
- 248 24. Gouri Sankar Bhunia, Pravat Kumar Shit, Ramkrishna Maiti. Comparison of GIS-based  
249 interpolation methods for spatial distribution of soil organic carbon (SOC). *Journal of the Saudi*  
250 *Society of Agricultural Sciences*. 2016, <http://dx.doi.org/10.1016/j.jssas.2016.02.001>.

251

252

## 253 **Supporting Information**

254 **S1 File: Ethical Clearance Certificate**

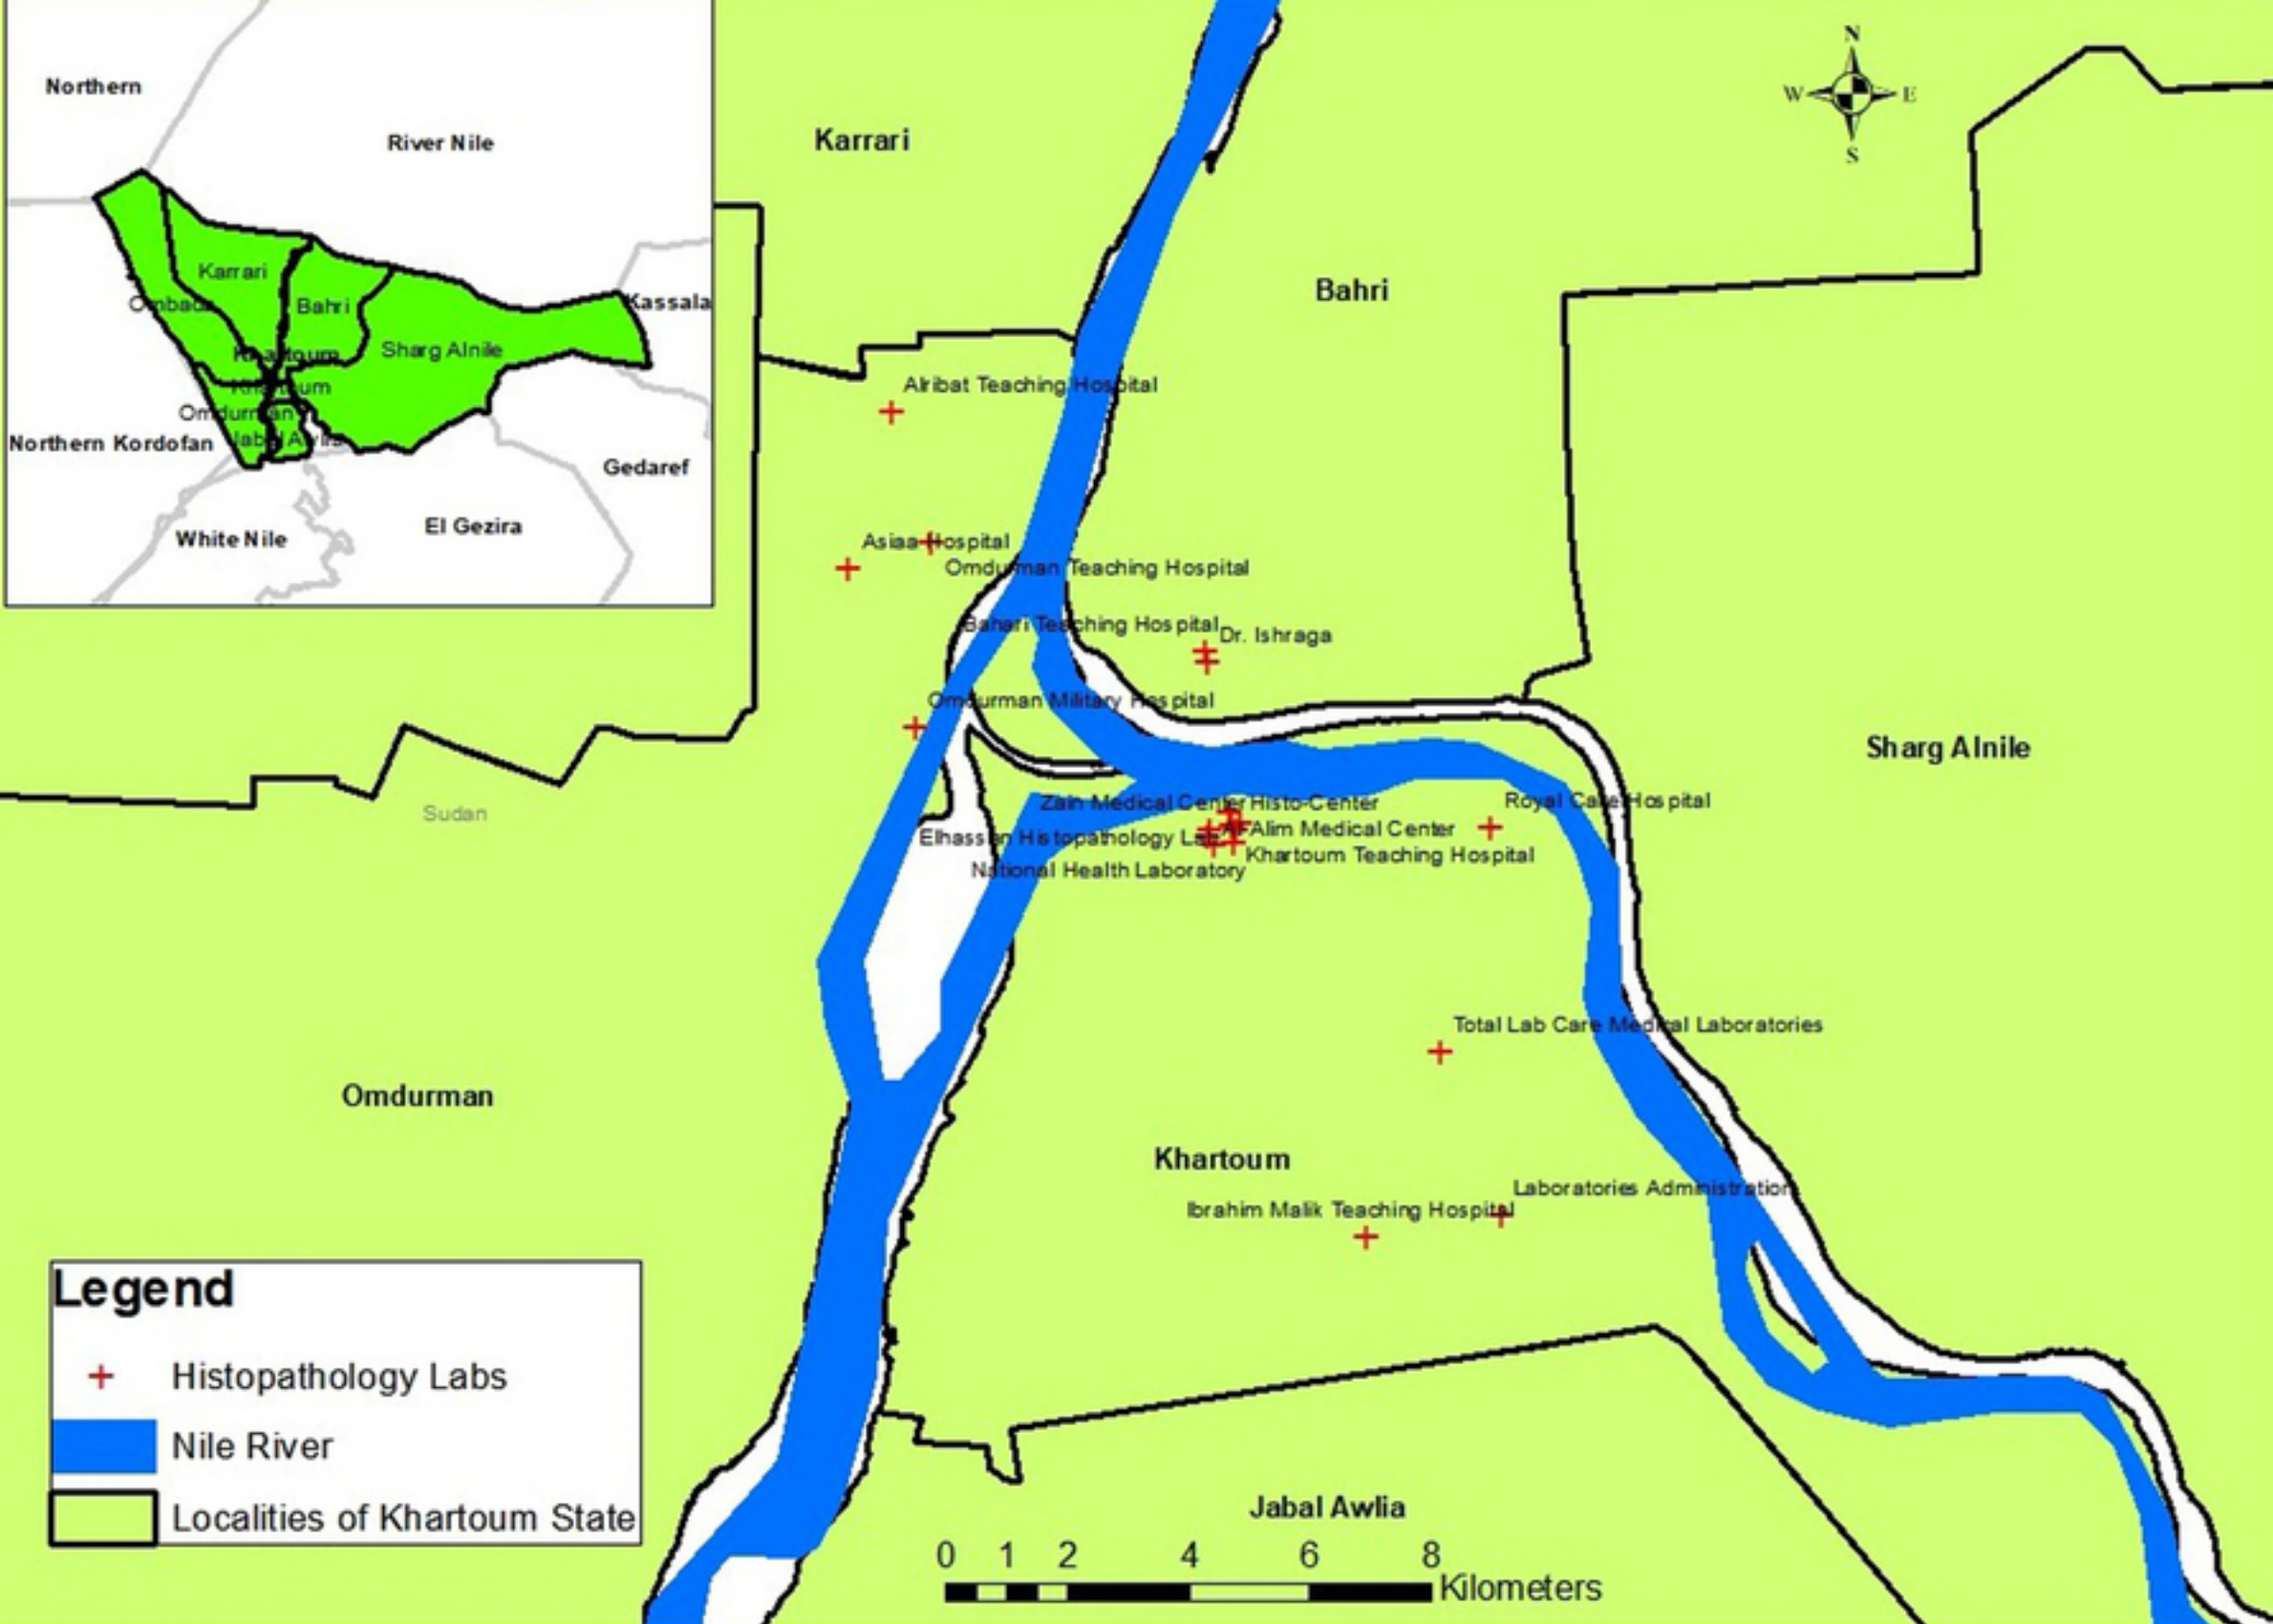

Figure

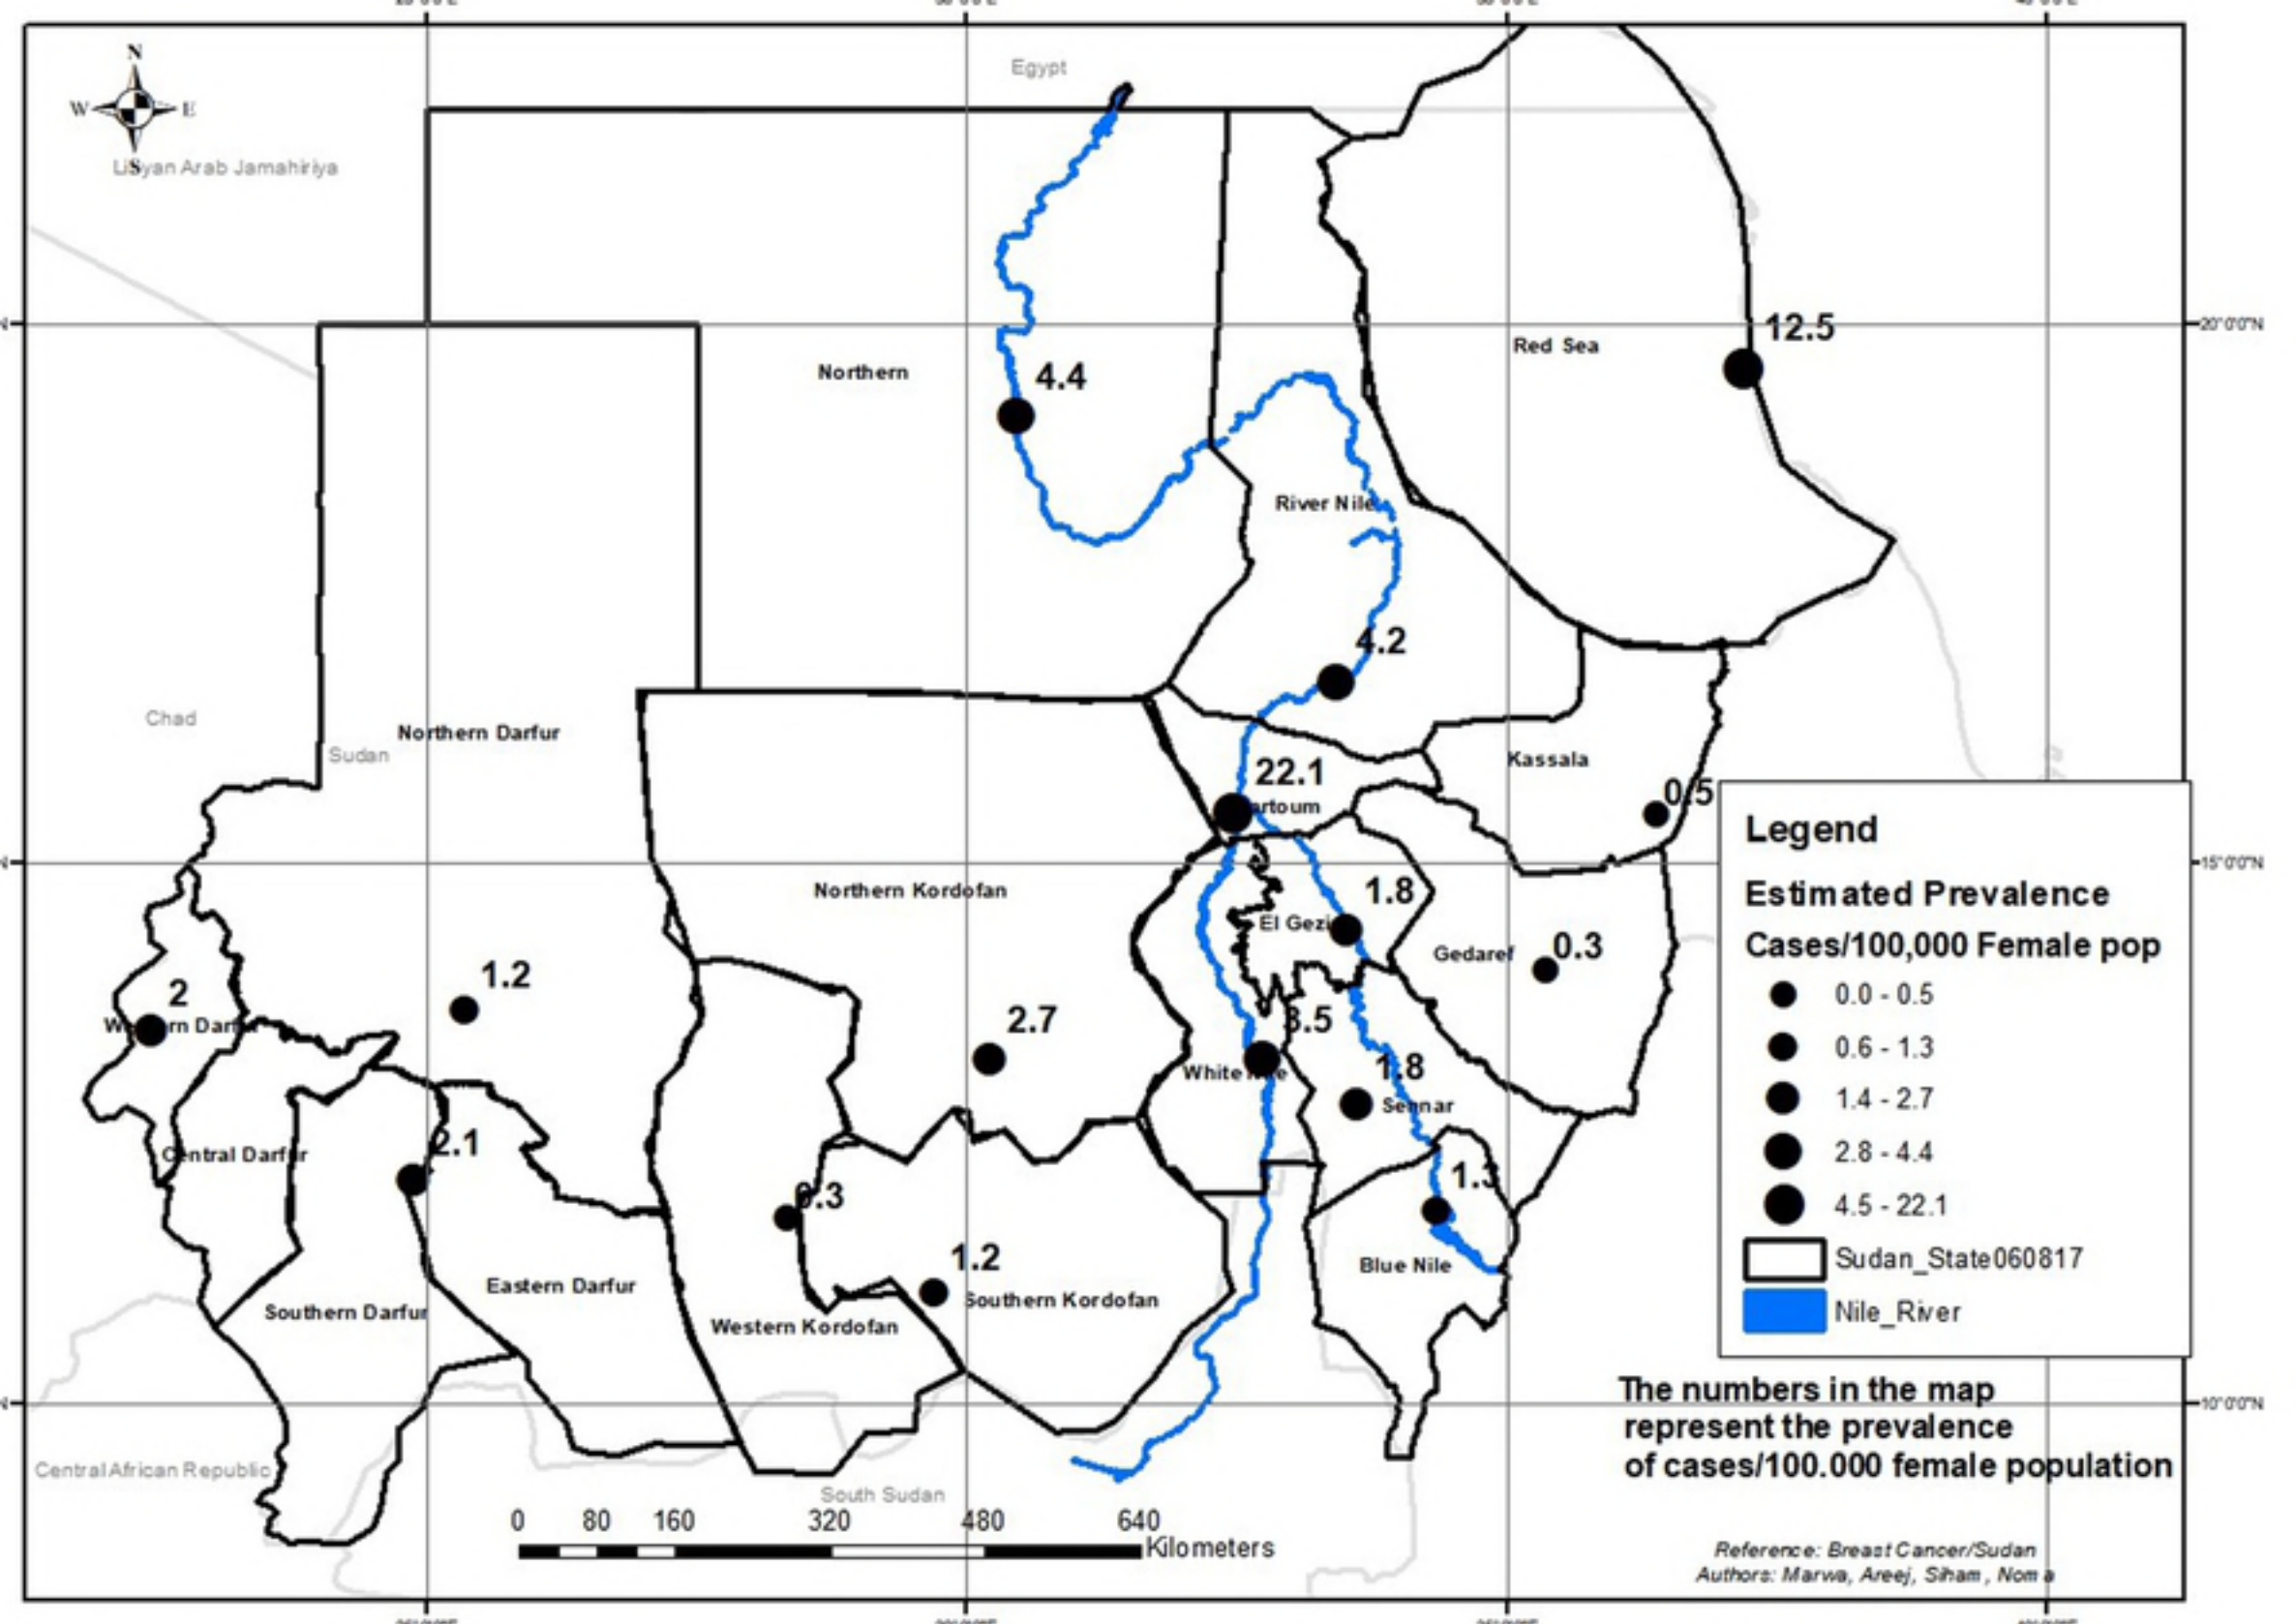

Figure

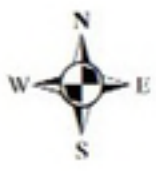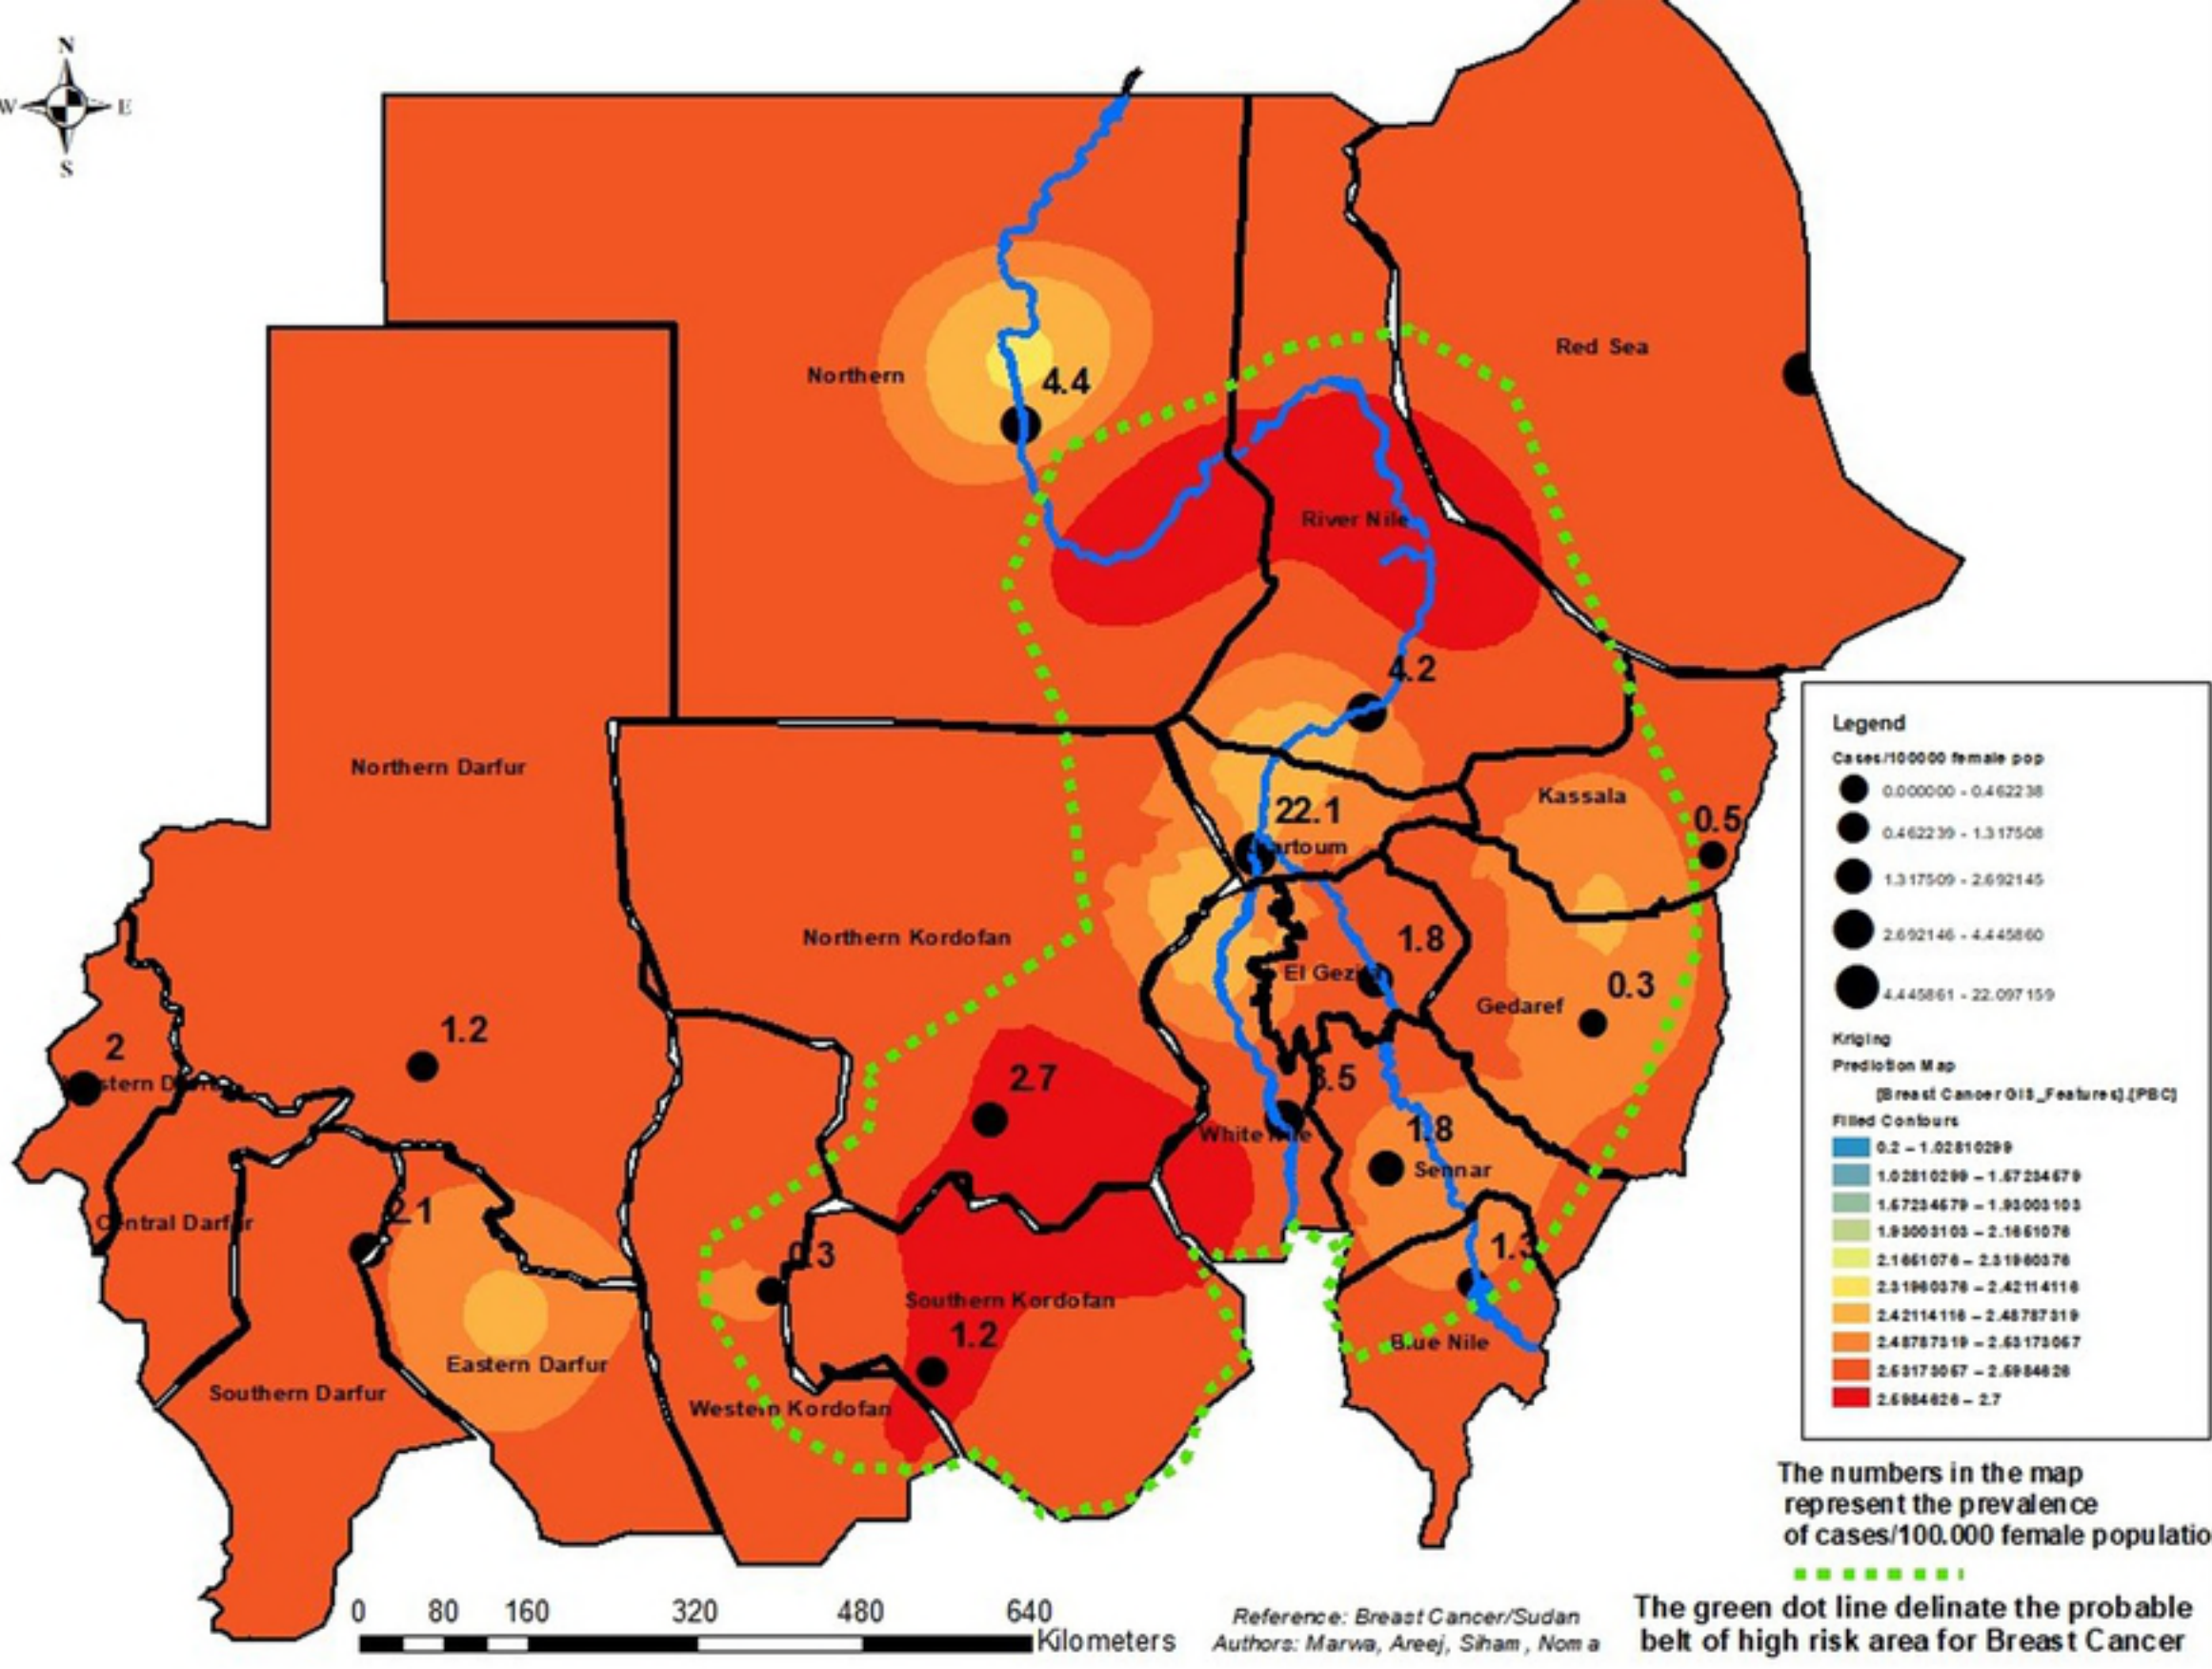

Figure
